# Supplementary material
Source: PubMed Central journal article supplement (PMC7080574)
Supplement: NIHMS1064934-supplement-Supp_FigS1-8_tableS1.pdf [file NIHMS1064934-supplement-Supp_FigS1-8_tableS1.pdf]

## ***New Phytologist* Supporting Information**

**Title: HOS15 and HDA9 negatively regulate immunity through histone deacetylation of intracellular immune receptor NLR genes in Arabidopsis**

Leiyun Yang, Xiangsong Chen, Zhixue Wang, Qi Sun, Anna Hong, Aiqin Zhang, Xuehua Zhong, Jian Hua

For correspondence:

Jian Hua Tel (+1) 607-255-5554, email [jh299@cornell.edu](mailto:jh299@cornell.edu)

Xuehua Zhong Tel (+1) 608-316-4421, email [xuehua.zhong@wisc.edu](mailto:xuehua.zhong@wisc.edu)

Article acceptance date: 8 December 2019

**The following Supporting Information is available for this article**

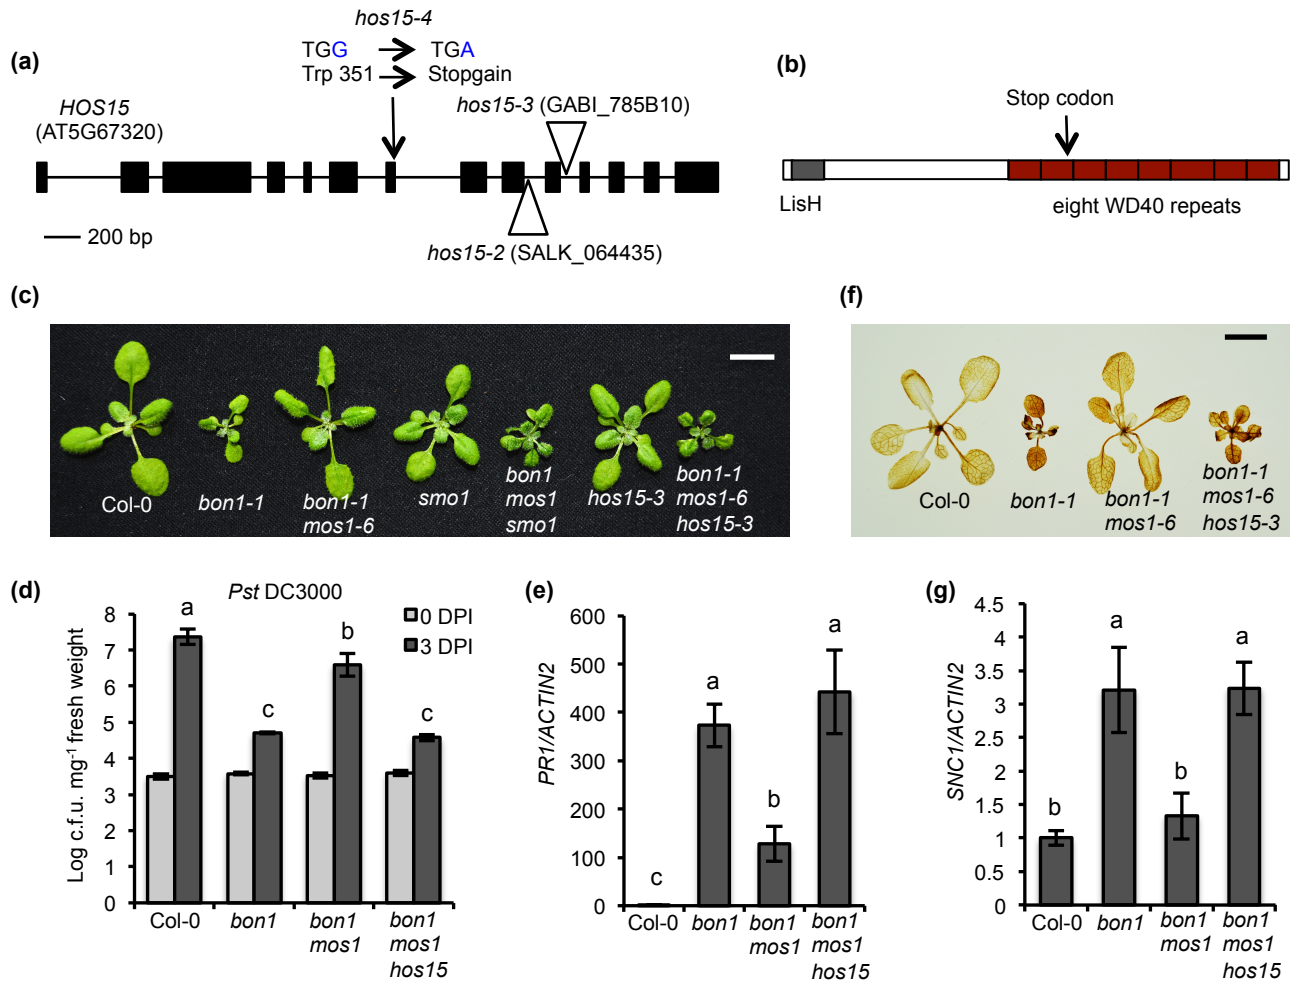

**Fig. S1** The *hos15-3* mutant suppressed *bon1 mos1*. (a) Intron-exon structure of *HOS15* gene. The point mutation in *hos15-4* and T-DNA insertion in *hos15-2* and *hos15-3* are indicated. (b) The LisH domain and eight WD40 repeats of *HOS15* protein. (c) Morphology of Col-0, *bon1-1*, *bon1-1 mos1-6*, *smo1*, *bon1 mos1 smo1*, *hos15-3*, *bon1-1 mos1-6 hos15-3*. (d) Growth of bacterial pathogen *Pst* DC3000 in Col-0, *bon1-1*, *bon1-1 mos1-6* and *bon1-1 mos1-6 hos15-3*. Statistical analysis was performed with infected plants. (e, g) Analysis of *PR1* (e) and *SNC1* (g) gene expression in Col-0, *bon1-1*, *bon1-1 mos1-6* and *bon1-1 mos1-6 hos15-3* by qRT-PCR. (f) DAB staining of Col-0, *bon1-1*, *bon1-1 mos1-6* and *bon1-1 mos1-6 hos15-3*. Error bars represent S.D. from three biological replicates for (d), (e) and (g). Different letters indicate significant difference tested by One-way ANOVA/ Duncan ( $P < 0.05$ ). Scale bar for (c) and (f), 1 cm.

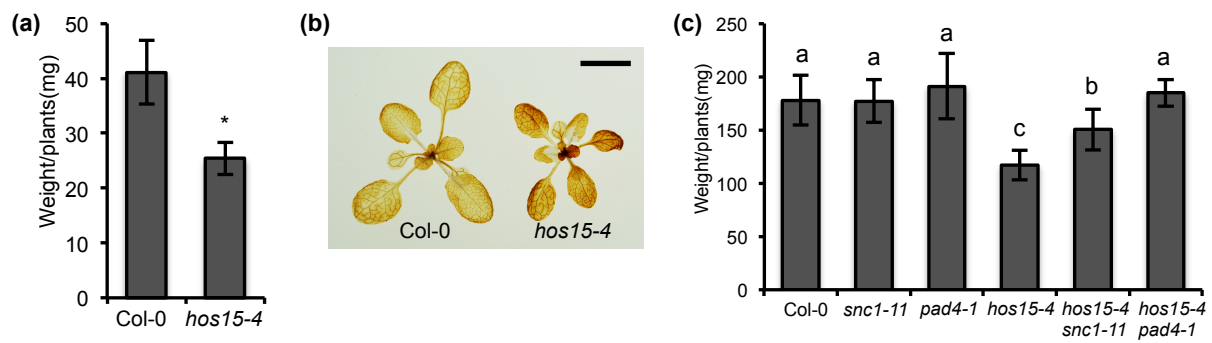

**Fig. S2** The *hos15-4* is dwarf and has H<sub>2</sub>O<sub>2</sub> accumulation. (a) Weight of Col-0 and *hos15-4*. \* indicates significant difference tested by Student's t-test ( $P < 0.05$ ),  $n \geq 15$ . (b) DAB staining of Col-0 and *hos15-4*. Scale bar, 1 cm. (c) Weight of Col-0, *snc1-11*, *pad4-1*, *hos15-4*, *hos15-4 snc1-11*, and *hos15-4 pad4-1*. Different letters indicate significant difference tested by One-way ANOVA/Duncan ( $P < 0.05$ ),  $n \geq 14$ . Error bars in (a) and (c) represent S.D..

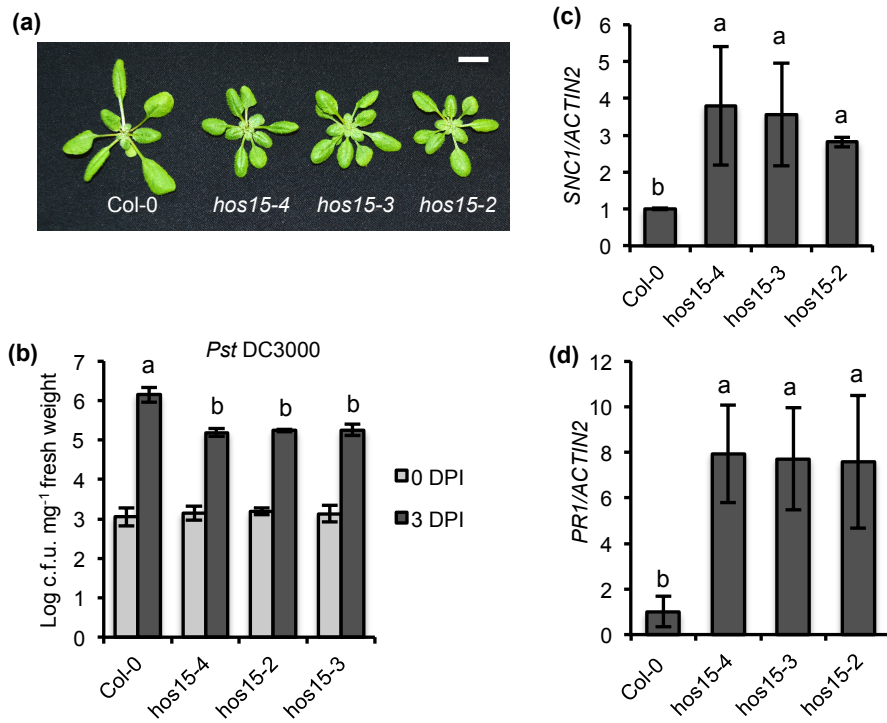

**Fig. S3** The *hos15-2*, *hos15-3* and *hos15-4* showed similar growth and immune phenotypes. (a) Morphology of Col-0, *hos15-4*, *hos15-3* and *hos15-2*. Scale bar, 1 cm. (b) Growth of bacterial pathogen *Pst* DC3000 in Col-0, *hos15-4*, *hos15-3* and *hos15-2*. Statistical analysis was performed with infected plants. (c, d) Analysis of *SNC1* (c) and *PR1* (d) gene expression in Col-0, *hos15-4*, *hos15-3* and *hos15-2* by qRT-PCR. Error bars represent S.D. from three biological replicates. Different letters indicate significant difference tested by One-way ANOVA/ Duncan ( $P < 0.05$ ).



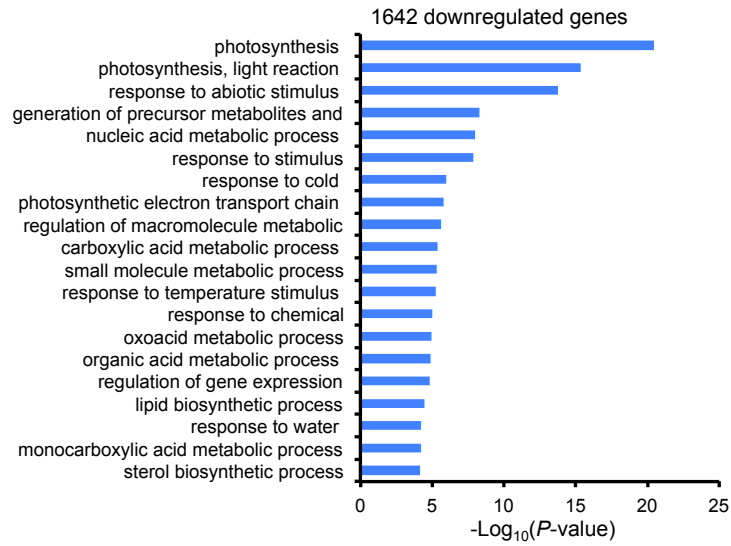

**Fig. S4** GO term enrichment analysis of downregulated genes in *hos15-4*. Gene Ontology analysis of significantly downregulated genes (Fold change > 2, FDR < 0.05) using Panther (<http://www.pantherdb.org>). Shown is the Top 20 most significant groups.

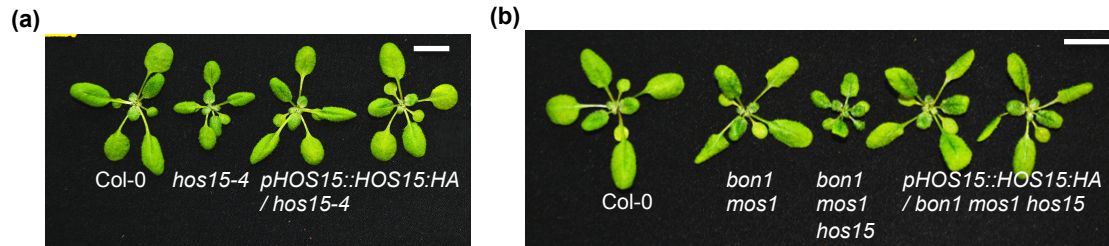

**Fig. S5** *pHOS15::HOS15:HA* complements *hos15-4* and *bon1 mos1 hos15*. (a) Morphology of Col-0, *hos15-4*, two independent transgenic lines of *pHOS15::HOS15:HA* in *hos15-4*. (b) Morphology of Col-0, *bon1-1 mos1-6*, *bon1-1 mos1-6 hos15-4* and two independent transgenic lines of *pHOS15::HOS15:HA* in *bon1-1 mos1-6 hos15-4*. Scale bar, 1 cm.

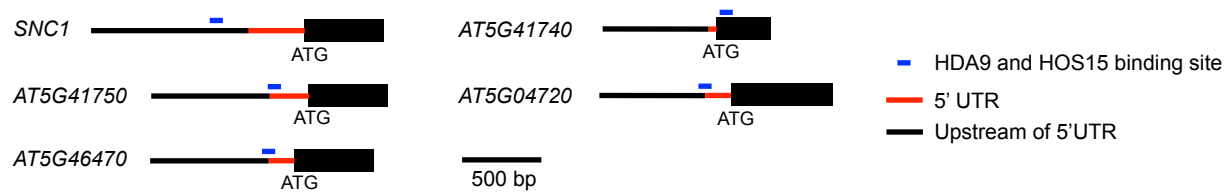

**Fig. S6** Predicted WRKY53 binding sites on NLR genes. Approximately 700-1000bp upstream of 5'UTR, 5'UTR and the "ATG" site of NLR genes were shown. The sequence of each NLR genes was extracted from TAIR (<https://www.arabidopsis.org>).

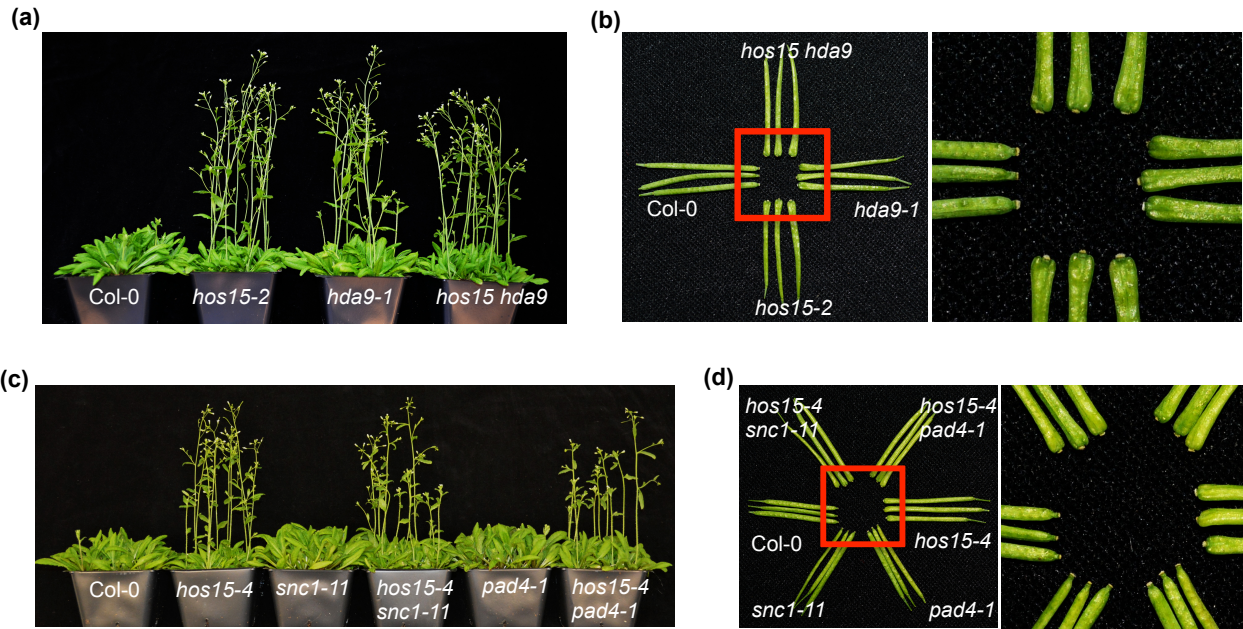

**Fig. S7** HOS15 regulates flowering time and silique development independent of its regulation on immunity. (a, b) Early flowering (a) and enlarged silique tips (b) in Col-0, *hos15-2*, *hda9-1* and *hos15-2 hda9-1*. (c, d) Flowering phenotype (c) and enlarged silique tips (d) of Col-0, *hos15-4*, *snc1-11*, *hos15-4 snc1-11*, *pad4-1* and *hos15-4 pad4-1*. The right panel in (b) and (d) is the zoom in of the red square in the left panel.

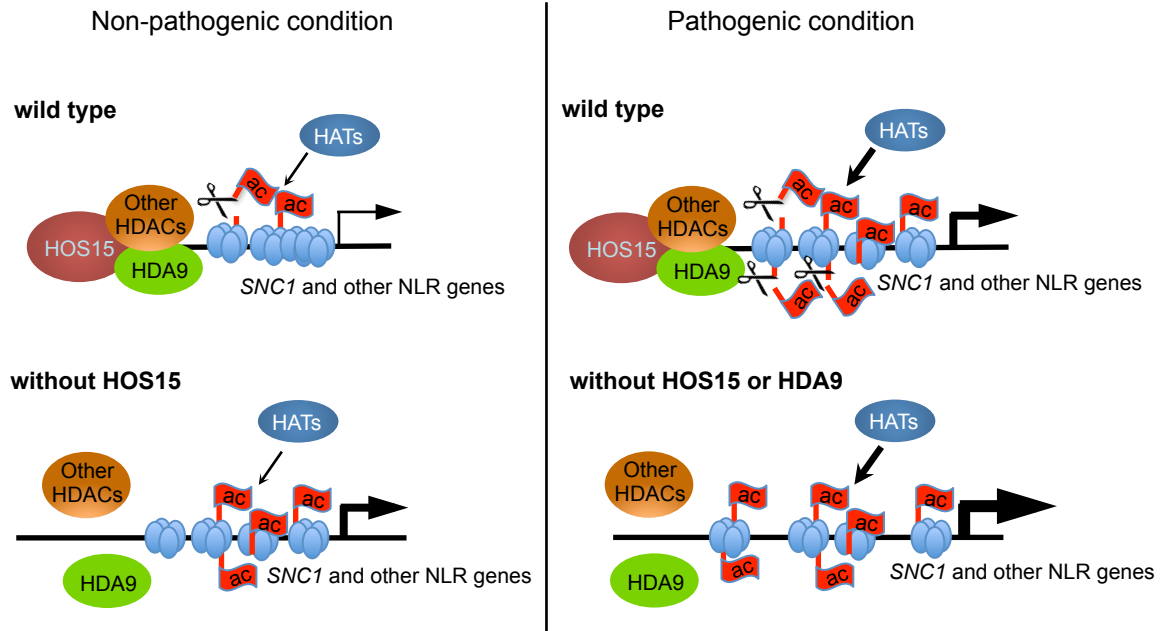

**Fig. S8** Working model for HOS15 and HDA9 in plant immunity. In non-pathogenic condition, the expression of *SNC1* and other NLR genes are low due to activities of HOS15 and its associated HDACs. In the absence of HOS15, the NLR genes are expressed at a high level causing autoimmunity. HAD9 may have overlapping function with other HDACs or play no significant role under this normal condition. Under pathogen infection, the expression of *SNC1* and other NLR genes is induced likely due to the increased activity of HATs. HOS15 and HDA9 prevent the over-induction of these genes through deacetylation activities. Without HOS15 or HDA9, the expression of NLR genes is hyper-induced, and the over-activation of immune response might have deleterious consequences on the growth and survival of plants.

**Table S1 Primers used in this study.**

| Primer name       | Sequence (5' to 3')                                         | Purpose                                                                          |                            |
|-------------------|-------------------------------------------------------------|----------------------------------------------------------------------------------|----------------------------|
| HOS15-gDNA F      | GTTCCACGTTGATCTTCCGAATC                                     | Complementation analysis                                                         |                            |
| HOS15-gDNA R      | GCCACGTCAGAATAAGAAGTG                                       |                                                                                  |                            |
| HOS15-dCAPs F     | CGAGAAGAGCAAGGATGTGAC                                       | Isolating <i>hos15-4</i> mutant from F2                                          |                            |
| HOS15-dCAPs R     | GAGTACTTATCAGTTCACCATTAAAT                                  |                                                                                  |                            |
| HOS15pro-F        | GGGGACAAGTTTGTACAAAAAAGCAGGCT<br>TCGTTCCACGTTGATCTTCCGAATC  | For HOS15-HA tag, BP cloning                                                     |                            |
| HOS15beforeSTP    | GGGGACCACTTTGTACAAGAAAGCTGGGT<br>TCATTCTGAAATCAAGAACGCAAATG |                                                                                  |                            |
| GABI_785B10 LP    | TTCGAATATCCCTCCATTTCC                                       | Genotyping <i>hos15-3</i>                                                        |                            |
| GABI_785B10 RP    | GCTGTTGTTGGGACGTAAAG                                        |                                                                                  |                            |
| SALKseq_064435 LP | AACCGTTCCCTTCATATCAC                                        | Genotyping <i>hos15-2</i>                                                        |                            |
| SALKseq_064435 RP | TTAAGTGAACAAGAAGGGGG                                        |                                                                                  |                            |
| SALK_007123 LP    | TTCTTGTTGATGATTGGAGCC                                       | Genotyping <i>hda9-1</i>                                                         |                            |
| SALK_007123 RP    | TTGAAACCGTCCTCACAAATC                                       |                                                                                  |                            |
| AT5G04720 qRT-F   | TGGGTCTCCGTAGACTTTACCA                                      | ChIP-qPCR for HDA9/HOS15 binding on NLR genes that upregulated in <i>hos15-4</i> |                            |
| AT5G04720 qRT-R   | GTAACAAGTAGGTGACGTTGTGG                                     |                                                                                  |                            |
| AT5G46470 qRT-F   | GGCTTGTGTGGTGGTGATTAAG                                      |                                                                                  |                            |
| AT5G46470 qRT-R   | TGGTCCCTAGCAATTGCATCATT                                     |                                                                                  |                            |
| AT5G41740 qRT-F   | CACCATGTCTTTTCGCGCTT                                        |                                                                                  |                            |
| AT5G41740 qRT-R   | AGTCGTGATACCTTTGCTTGC                                       |                                                                                  |                            |
| AT5G41750 qRT-F   | TGGTCCTCGACGACTATAACAA                                      |                                                                                  |                            |
| AT5G41750 qRT-R   | TCGAAGAAATTGGAATGTAAGTGA                                    |                                                                                  |                            |
| SNC1 qRT-F        | TTGAACCACTGACAGCCACA                                        |                                                                                  |                            |
| SNC1 qRT-R        | AGACAGAACTTCCTCGAGAGC                                       |                                                                                  |                            |
| PR1 qPCR F        | CGAGAAGGCTAACTACAACACTACG                                   |                                                                                  |                            |
| PR1 qPCR R        | ACACCTCACTTTGGCACATC                                        |                                                                                  |                            |
| SNC1 qPCR F       | GAATCGAATGTCTCTATCTGC                                       |                                                                                  |                            |
| SNC1 qPCR R       | CTGTAAAGTCGGCGAGCTCA                                        |                                                                                  |                            |
| AT5G41740 qRT-F2  | GCTGAGGGTGACAGTAGCAG                                        |                                                                                  | qRT-PCR of gene expression |
| AT5G41740 qRT-R2  | TCCATCTCCATCAAGCTTCCG                                       |                                                                                  |                            |
| AT5G46470 qRT-F2  | GCAGTTGCTCGAGTTTGGTG                                        |                                                                                  |                            |
| AT5G46470 qRT-R2  | AACCGTGAGCATCCACTGAG                                        |                                                                                  |                            |
| ACT2 qPCR F       | CACCACCTGAAAGGAAGTACAG                                      | qRT-PCR internal control                                                         |                            |
| ACT2 qPCR R       | TGGACCTGCCTCATCATACT                                        |                                                                                  |                            |
| SNC1CHIP1-F       | GTTTCGTGGCCATCTTGTCA                                        | qRT-PCR for ChIP-H3K9ac at <i>SNC1</i>                                           |                            |
| SNC1CHIP1-R       | CTGAGGAATGAGTCACGGACATC                                     |                                                                                  |                            |
| Spike-in ChIP F   | TCCATGACAACCTTGGTATCGTG                                     | Spike-in amplification used in ChIP                                              |                            |
| Spike-in ChIP R   | GGAGCCAGTCTTGGATGAGAAAG                                     |                                                                                  |                            |
